# Supplementary material for: Gaseous elemental mercury (GEM) fluxes over canopy of two typical subtropical forests in south China
Source: Copernicus journal article supplement (doi:10.5194/acp-2017-349), 2017-05-29
Supplement: Supplementary file [file SI-GEM fluxes -revised.pdf › Response to review commets-Anonymous Referee/SI-GEM fluxes -revised.pdf]

2 **Gaseous elemental mercury (GEM) fluxes over canopy of two typical**  
3 **subtropical forests in south China**

4 Qian Yu<sup>1</sup>, Yao Luo<sup>1</sup>, Shuxiao Wang<sup>1,2</sup>, Zhiqi Wang<sup>1</sup>, Jiming Hao<sup>1,2</sup>, Lei Duan<sup>1,2</sup>

5 <sup>1</sup>State Key Laboratory of Environmental Simulation and Pollution Control, School of Environment, Tsinghua University,  
6 Beijing 100084, China.

7 <sup>2</sup>Collaborative Innovation Centre for Regional Environmental Quality, Tsinghua University, Beijing 100084, China.

8 Correspondence to: Lei Duan (lduan@tsinghua.edu.cn)

|    |                                                                                                    |                                    |
|----|----------------------------------------------------------------------------------------------------|------------------------------------|
| 9  | <a href="#">1 Calculation steps of turbulent transfer coefficient (<i>K</i>):.....</a>             | <a href="#">Page S1</a>            |
| 10 | <a href="#">References .....</a>                                                                   | <a href="#">Page S2</a>            |
| 11 | <a href="#">Table S1.....</a>                                                                      | <a href="#">Page S2</a>            |
| 12 | <a href="#">Table S2.....</a>                                                                      | <a href="#">Page S3</a>            |
| 13 | <a href="#">Figure S1. ....</a>                                                                    | <a href="#">Page S4</a>            |
| 14 | <a href="#">Figure S2. ....</a>                                                                    | <a href="#">Page S6</a>            |
| 15 | <a href="#">Figure S3. ....</a>                                                                    | <a href="#">Page S7</a>            |
| 16 | <a href="#">Figure S4. ....</a>                                                                    | <a href="#">Page S8</a>            |
| 17 | <a href="#">Figure S5. ....</a>                                                                    | <a href="#">Page S9</a>            |
| 18 | <a href="#">Figure S6. ....</a>                                                                    | <a href="#">Page S10</a>           |
| 19 | <del><a href="#">1 Calculation steps of turbulent transfer coefficient (<i>K</i>): .....</a></del> | <del><a href="#">Page S1</a></del> |
| 20 | <del><a href="#">References .....</a></del>                                                        | <del><a href="#">Page S2</a></del> |
| 21 | <del><a href="#">Table S1.....</a></del>                                                           | <del><a href="#">Page S2</a></del> |
| 22 | <del><a href="#">Table S2.....</a></del>                                                           | <del><a href="#">Page S3</a></del> |
| 23 | <del><a href="#">Figure S1. ....</a></del>                                                         | <del><a href="#">Page S4</a></del> |
| 24 | <del><a href="#">Figure S2. ....</a></del>                                                         | <del><a href="#">Page S5</a></del> |
| 25 | <del><a href="#">Figure S3. ....</a></del>                                                         | <del><a href="#">Page S6</a></del> |

28 **1 Calculation steps of turbulent transfer coefficient ( $K$ ):**

29 Turbulent transfer coefficient  $K$  was calculated according to the similarity theory after the measurement of the wind speed and  
30 temperature profile (Yu and Sun, 2006)

31 (1) Calculation of Richard Sunds ( $R_i$ ):

$$32 \quad R_i = \frac{g(\frac{T_2-T_1}{z_2-z_1} + \gamma_d)}{T_0(\frac{u_2-u_1}{z_2-z_1})^2}, \quad (S1)$$

33 where  $g$  is the acceleration of gravity ( $9.8 \text{ m s}^{-2}$ ),  $\gamma_d$  is the dry adiabatic lapse rate ( $0.00976 \text{ K m}^{-1}$ ),  $z_1$  and  $z_2$  are the heights (m),  
34  $T_1$ ,  $T_2$  and  $T_0$  are the temperatures at two heights and the mean value (K),  $u_1$  and  $u_2$  are wind speeds at two heights ( $\text{m s}^{-1}$ ).

35 (2) Determination of the initial atmospheric stability ( $\zeta_0$ ):

$$36 \quad \zeta_0 = \begin{cases} R_i, & R_i < 0 \\ \frac{R_i}{1-5R_i}, & 0 \leq R_i \leq 0.1, \\ 0.2, & R_i > 0.1 \end{cases} \quad (S2)$$

37 (3) Determination of universal dimensionless gradient function( $\Phi(\zeta)$ ):

$$38 \quad \Phi_m(\zeta_0) = \begin{cases} (1 - 15\zeta_0)^{-1/4}, & \zeta_0 \leq 0 \\ 1 + 5\zeta_0, & \zeta_0 > 0 \end{cases}, \quad (S3)$$

$$39 \quad \Phi_h = \Phi_c = \begin{cases} \Phi_m^2, & \zeta_0 \leq 0 \\ \Phi_m, & \zeta_0 > 0 \end{cases}, \quad (S4)$$

40 where  $\Phi_h$ ,  $\Phi_c$  and  $\Phi_m$  are the universal functions of sensible heat, mercury, and momentum.

41 (4) Calculation of scales of speed ( $u_*$ ) and temperature ( $\theta_*$ ):

$$42 \quad u_* = \frac{\kappa(u_2-u_1)}{\Phi_m(\zeta_0)\ln[(z_2-d)/(z_1-d)]}, \quad (S5)$$

$$43 \quad \theta_* = \frac{\kappa(T_2-T_1)}{\Phi_h(\zeta_0)\ln[(z_2-d)/(z_1-d)]}, \quad (S6)$$

44 where  $d$  is the displacement of zero plane (m), equal to 0.7 times of the vegetation height,  $\kappa$  is the Karman constant (0.4).

45 (5) Calculation of Monin-Obukhov length ( $L$ ) and atmospheric stability ( $\zeta$ ):

$$46 \quad L = \frac{u_*^2}{\kappa^2 \frac{g}{\theta_0}}, \quad (S7)$$

$$47 \quad \zeta = z / L, \quad (S8)$$

48 where  $\theta_0 = T_0$ , and  $z$  indicates the height related to the flux (m).

49 (6) If there is a large difference between  $\zeta$  and  $\zeta_0$ , set  $\zeta_0 = \zeta$  and repeat steps (3)-(5) until  $\zeta$  converging to one value.

50 (7) Calculation of turbulent transfer coefficient ( $K$ ) using the parameters

51 
$$K = \frac{u_* Kz}{\Phi_c(\zeta)}, \tag{S9}$$

52 **References**

53 Yu, G., and Sun, X.: The principle and method of terrestrial ecosystems flux observations. Higher Education Press, Beijing,  
54 2006. (In Chinese)

55

56 **Table S1.** Sensors used for measuring meteorological parameters

| Sensor type                            | Version                                | Detection range            | Accuracy             |
|----------------------------------------|----------------------------------------|----------------------------|----------------------|
| Air temperature (two heights)          | 43347-L (R. M. Young Inc., USA)        | -50 ~50°C                  | ± 0.1°C              |
| Wind speed and direction (two heights) | WindSonic (Gill Inc., UK)              | Wind speed: 0 ~ 60<br>m/s  | ± 2% speed           |
|                                        |                                        | Wind direction: 0–<br>359° | ± 3° direction       |
| Air temperature and humidity           | HMP 155A (Vaisala Inc., Finland)       | Temperature: -80–<br>60°C  | ± 0.2°C              |
|                                        |                                        | Humidity: 0.8–100%         |                      |
| Solar radiation                        | CS300 (Campbell Scientific Inc., USA)  | 300–1120 nm                | ± 5%                 |
| Soil temperature and moisture          | CS 616 (Campbell Scientific Inc., USA) | Temperature: -30–<br>70°C  | Temperature: ± 0.5°C |
|                                        |                                        | Moisture: 0.05–0.5         | Moisture: ± 5%       |
| Precipitation                          | 52202/52203 (R. M. Young Inc., USA)    | ≥ 0.1 mm                   | 2% (≤ 25 mm/h)       |
|                                        |                                        |                            | 3% (≤ 50 mm/h)       |

57

58

60 **Table S2.** Seasonal atmospheric GEM flux and meteorological parameters at QYZ and HT sites. Data format: mean value (variance), min  
61 value ~ max value.

|        |     | Atmospheric GEM<br>concentration (ng m <sup>-3</sup> ) | Air<br>temperature<br>(°C) | Air<br>humidity<br>(%) | Soil<br>temperature<br>(°C) | Soil<br>moisture<br>(%) | Solar<br>radiation (W<br>m <sup>-2</sup> ) |
|--------|-----|--------------------------------------------------------|----------------------------|------------------------|-----------------------------|-------------------------|--------------------------------------------|
| Winter | QYZ | 4.05 (1.53)                                            | 7.64 (5.67)                | 72.5 (21.7)            | 8.52 (2.37)                 | 0.30 (0.02)             | 221 (221)                                  |
|        |     | 1.64 ~ 11.7                                            | -4.51 ~ 25.9               | 16.4 ~ 98.7            | 3.90 ~ 15.2                 | 0.27 ~ 0.36             | 0 ~ 846                                    |
|        | HT  | 5.94 (3.20)                                            | 6.42 (5.12)                | 77.9 (20.2)            | 7.33 (2.40)                 | 0.28 (0.01)             | 169 (188)                                  |
|        |     | 1.32 ~ 22.9                                            | -5.15 ~ 24.0               | 15.8 ~ 100             | 1.78 ~ 14.3                 | 0.26 ~ 0.32             | 0 ~ 857                                    |
| Spring | QYZ | 3.47 (1.81)                                            | 19.0 (6.08)                | 82.2 (15.9)            | 18.0 (4.35)                 | 0.37 (0.02)             | 224 (246)                                  |
|        |     | 0.97~17.4                                              | 4.60 ~ 33.6                | 31.3 ~ 98.4            | 8.00 ~ 26.2                 | 0.31 ~ 0.47             | 0 ~ 987                                    |
|        | HT  | 5.50 (2.91)                                            | 16.7 (5.56)                | 86.4 (14.2)            | 16.1 (3.99)                 | 0.28 (0.02)             | 201 (232)                                  |
|        |     | 1.45 ~ 22.9                                            | 4.93 ~ 32.1                | 25.4 ~ 99.5            | 7.42 ~ 25.1                 | 0.24 ~ 0.34             | 0 ~ 971                                    |
| Summer | QYZ | 3.30 (1.23)                                            | 27.3 (3.77)                | 80.0 (15.8)            | 26.1 (1.52)                 | 0.37 (0.04)             | 325 (291)                                  |
|        |     | 1.60 ~ 8.83                                            | 20.1 ~ 36.8                | 35.9 ~ 98.3            | 22.8 ~ 29.5                 | 0.28 ~ 0.52             | 0 ~1000                                    |
|        | HT  | 5.51 (3.09)                                            | 25.2 (3.73)                | 87.4 (14.0)            | 26.6 (1.93)                 | 0.25 (0.02)             | 207 (261)                                  |
|        |     | 1.43 ~ 21.4                                            | 18.0 ~ 36.0                | 41.4 ~ 99.7            | 22.4 ~ 30.1                 | 0.21 ~ 0.31             | 0 ~ 988                                    |
| Fall   | QYZ | 3.75 (1.18)                                            | 20.7 (6.16)                | 80.3 (17.0)            | 20.5 (3.93)                 | 0.26 (0.03)             | 252 (235)                                  |
|        |     | 1.42 ~ 8.76                                            | 5.66 ~ 36.3                | 32.4 ~ 100             | 12.1 ~ 28.3                 | 0.22 ~ 0.35             | 0 ~ 943                                    |
|        | HT  | 6.64 (3.26)                                            | 19.3 (6.04)                | 83.9 (16.3)            | 20.5 (4.83)                 | 0.26 (0.02)             | 217 (245)                                  |
|        |     | 1.56 ~ 22.9                                            | 1.45 ~ 34.4                | 34.6 ~ 100             | 8.61 ~ 28.5                 | 0.23 ~ 0.31             | 0 ~ 965                                    |

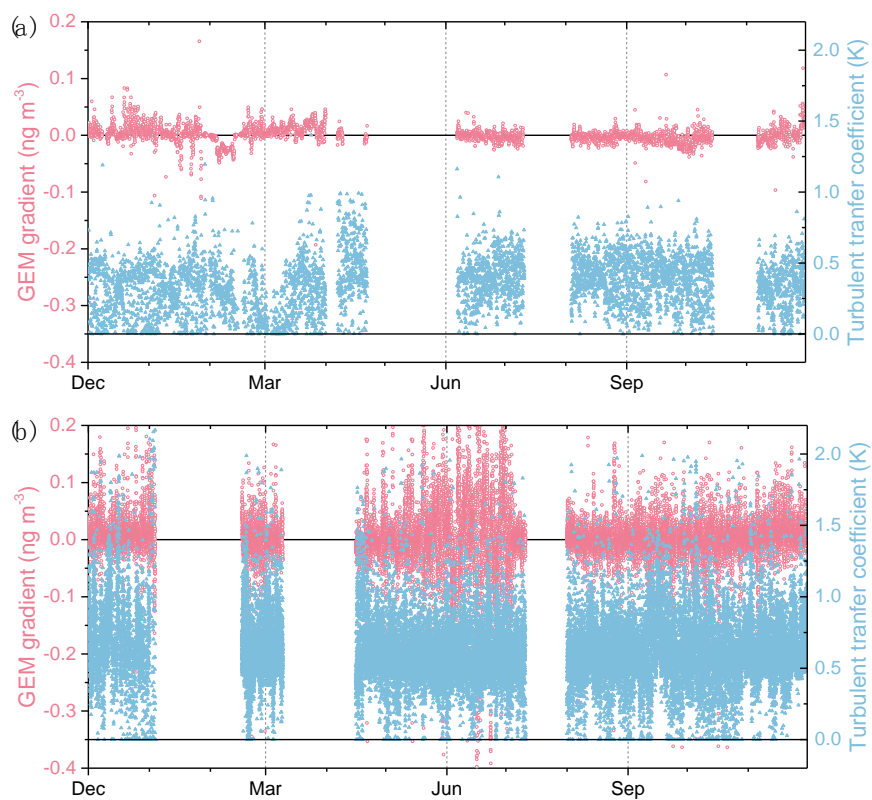

**Figure S1.** Annual variations of GEM gradient and turbulent transfer coefficient (K) at QYZ (a) and HT (b) stations. The observations lasted for one year at both sites (January to December in 2014).

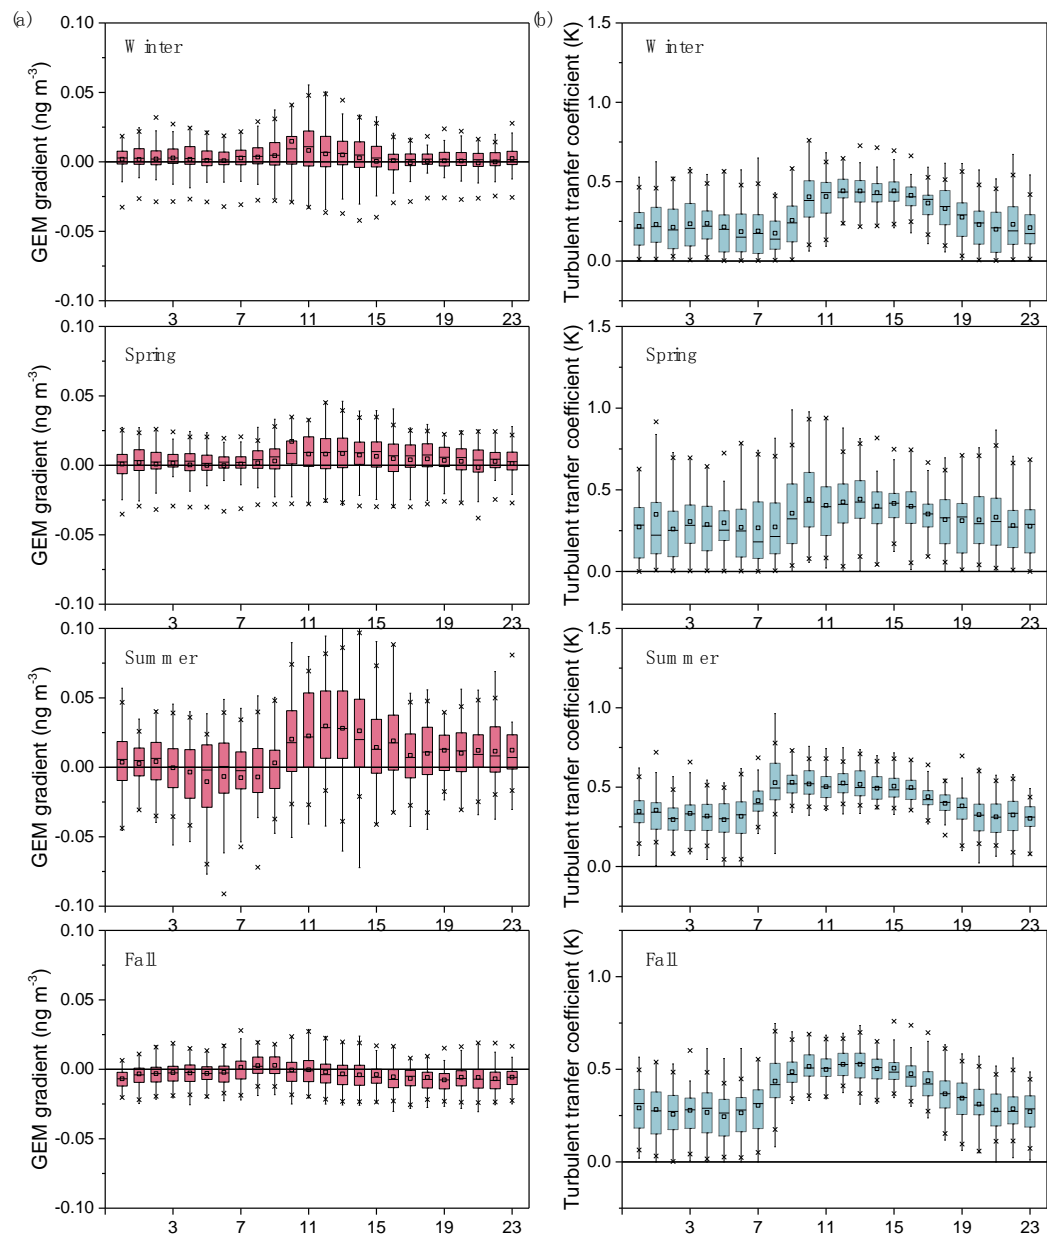

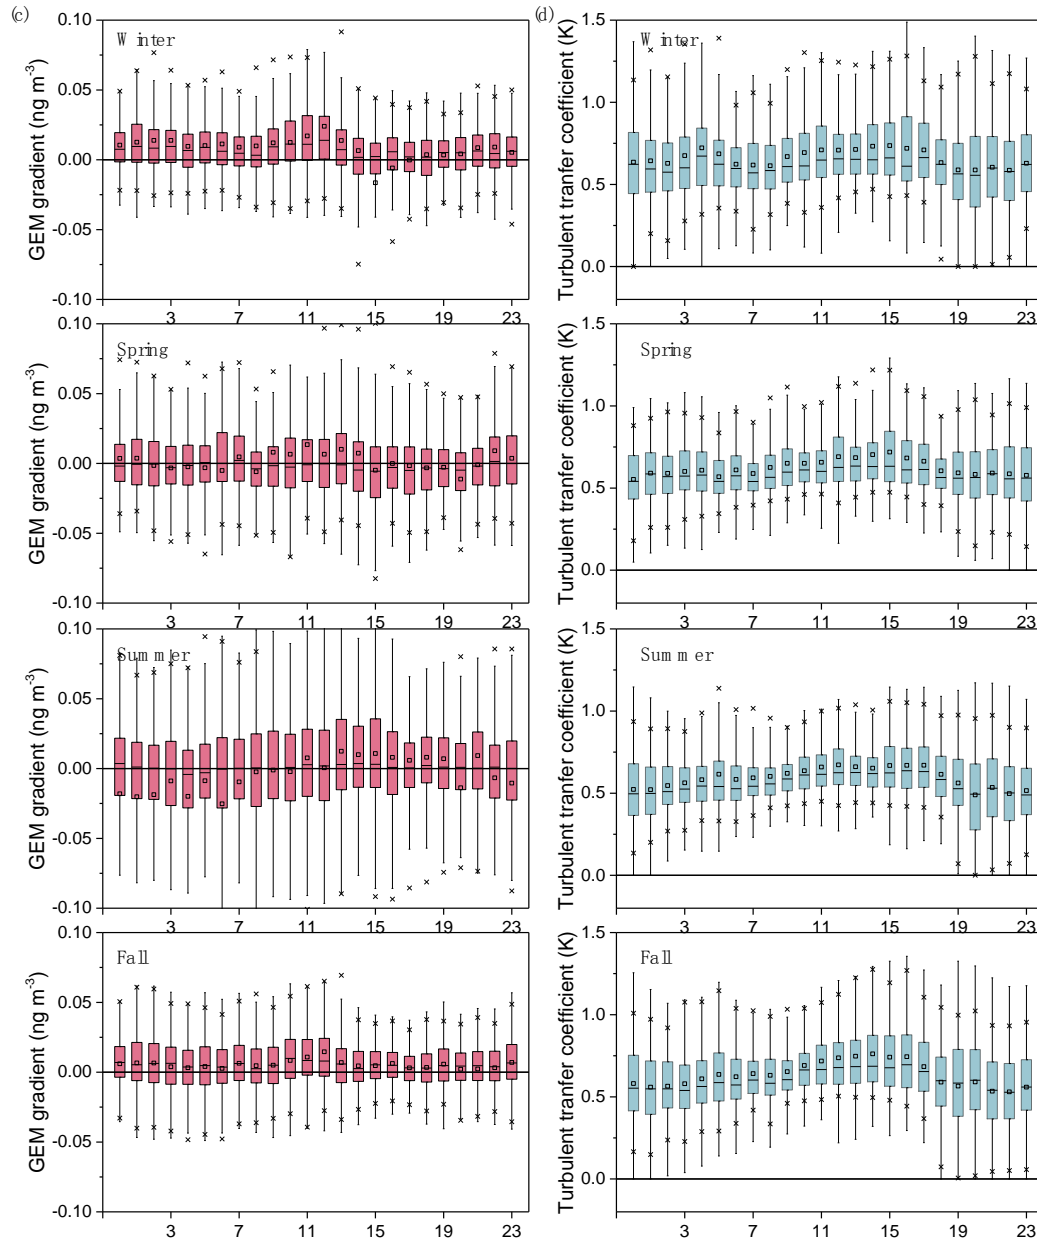

68

69 **Figure S2.** Diurnal variations of GEM gradient and turbulent transfer coefficient (K) in each season. (a) GEM gradient at QYZ; (b) K at  
70 QYZ; (c) GEM gradient at HT; (d) K at HT. Box horizontal border lines represent the 25<sup>th</sup>, 50<sup>th</sup> and 75<sup>th</sup> percentiles from bottom to top, the  
71 whiskers represent outliers, and the 5<sup>th</sup> and 95<sup>th</sup> percentiles are marked as cross. The open square in the box represents the mean value.

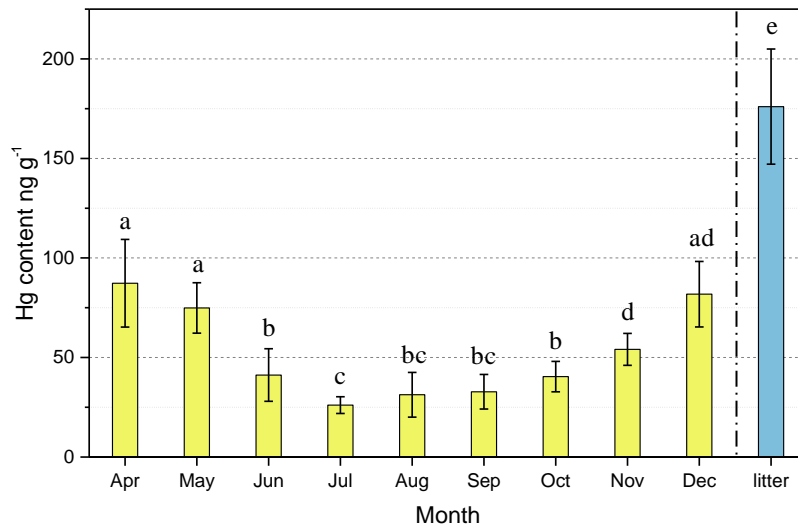

**Figure S4S3.** The monthly variation of Hg content of current-year foliage of *cunninghamia lanceolata* and the Hg content of litter at HT site. Different letters in a column mean significant difference ( $n = 18$ ,  $p < 0.05$ ).



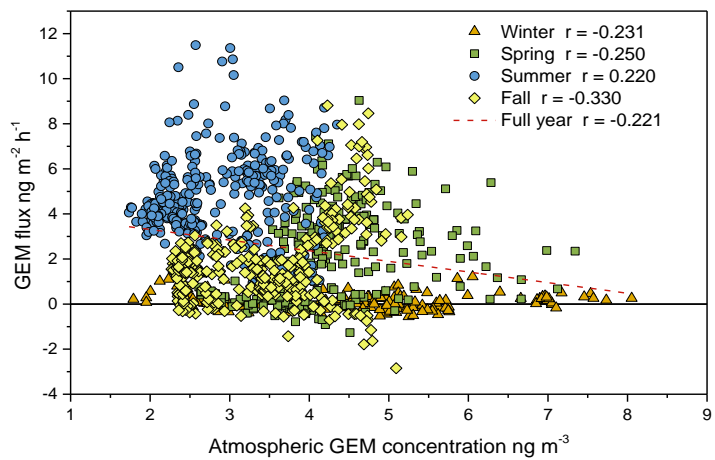

77

78 **Figure S2S4.** The correlation of GEM flux and atmospheric GEM concentration of soil at QYZ site (unpublished data).

79

80  
81

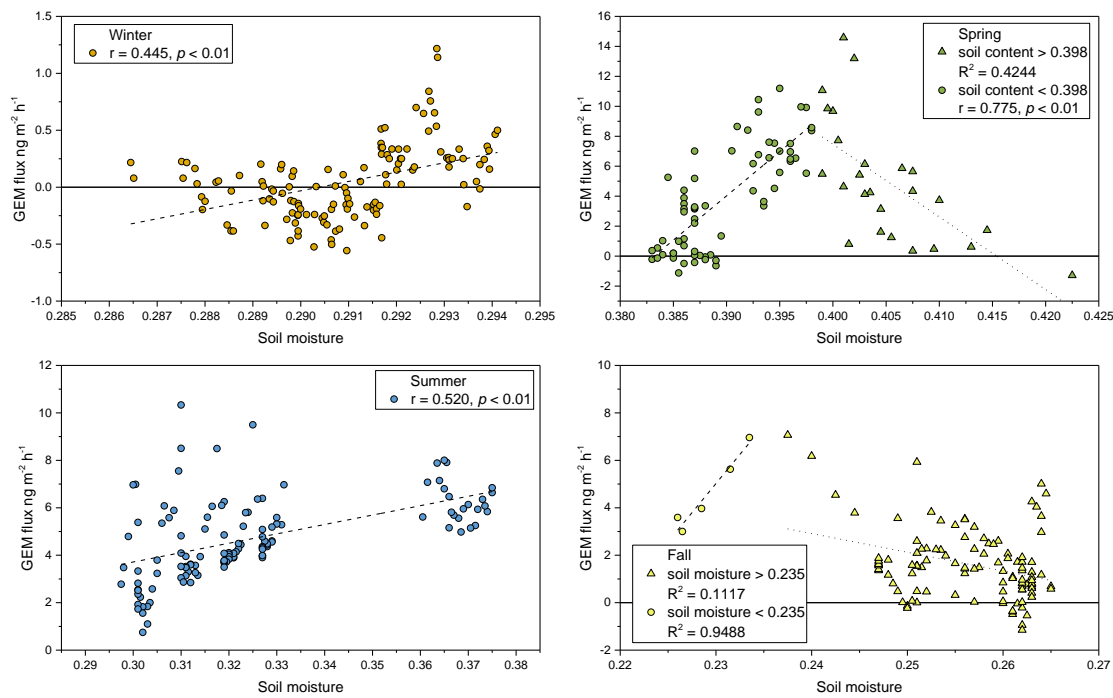

82

83 **Figure S3S5.** The soil GEM flux varied with the change of soil moisture in winter (a), spring (b), summer (c) and fall (d) at QYZ site  
84 (unpublished data).

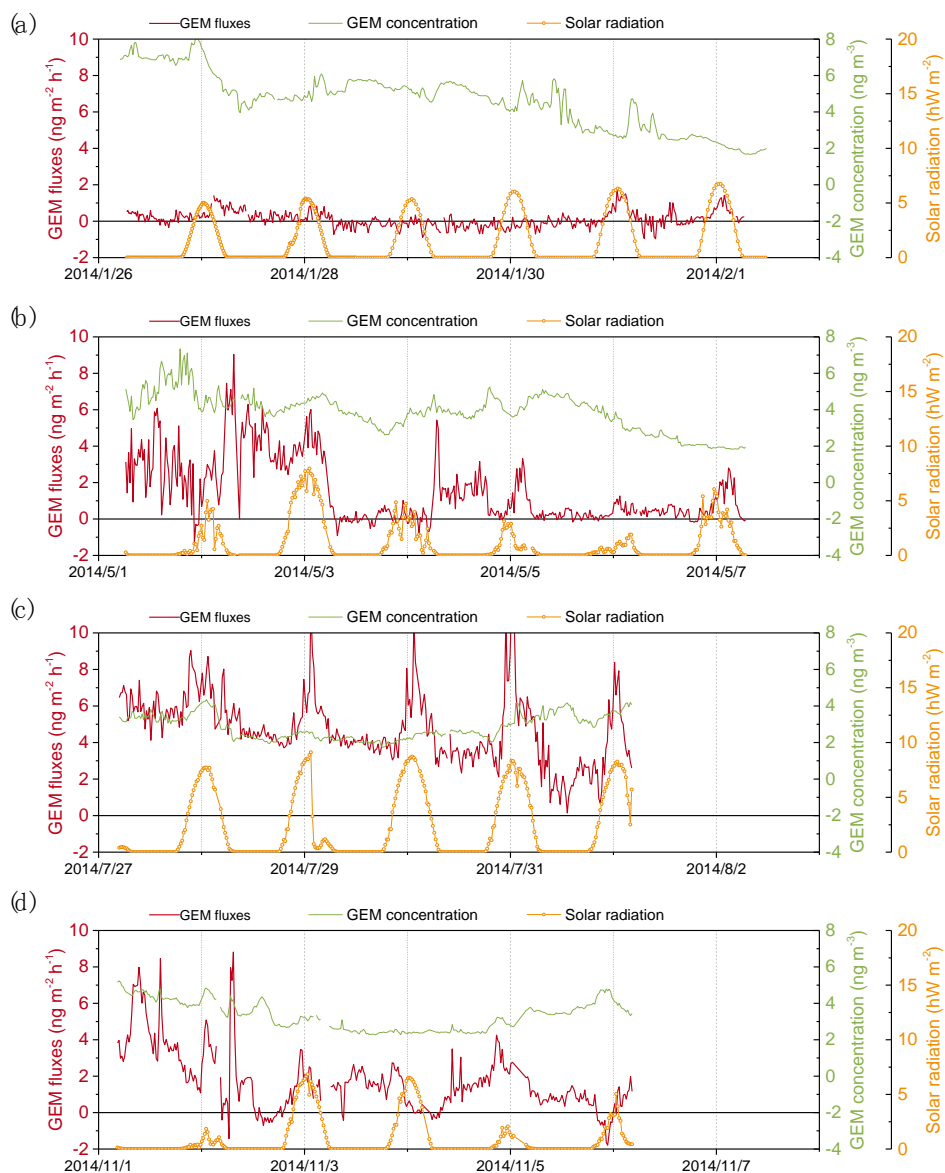

**Figure S6.** The diurnal variation of soil GEM emission fluxes, GEM concentrations and solar radiations in winter (a), spring (b), summer (c) and fall (d) (unpublished data).
